# Supplementary material for: Inosine Induces Stemness Features in CAR T cells and Enhances Potency
Source: PubMed Central journal article supplement — bioRxiv. 2023 Apr 25:2023.04.21.537859. Preprint. [Version 1] doi: 10.1101/2023.04.21.537859 (PMC10168291; doi:10.1101/2023.04.21.537859), 2023-04-25

**A**

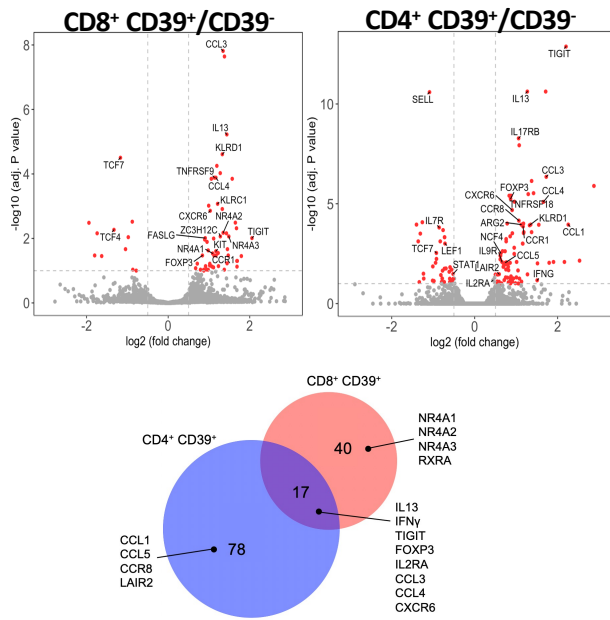

**B**

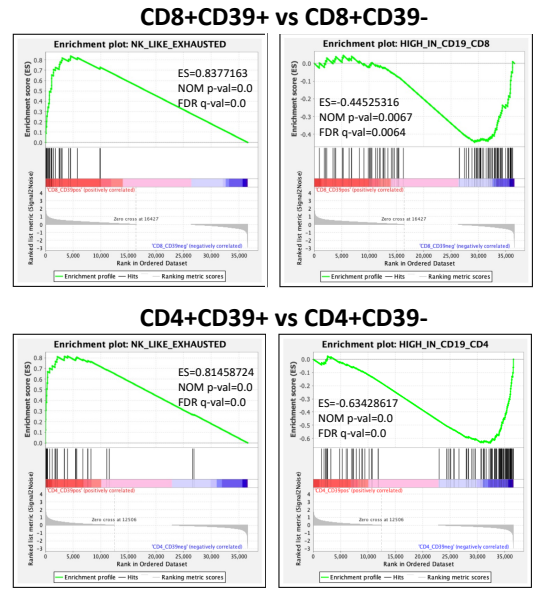

**C**

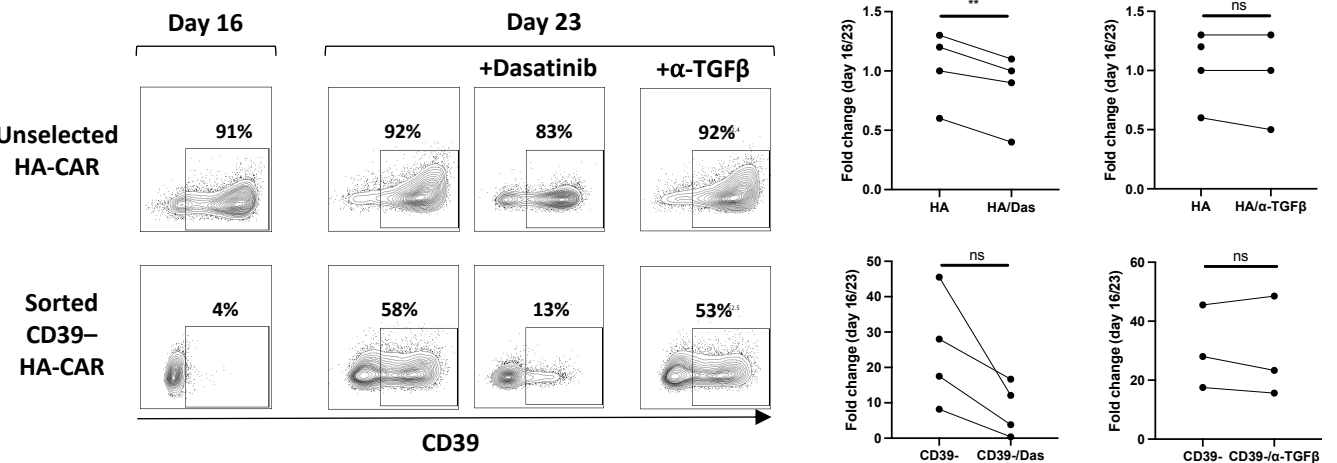

**D**

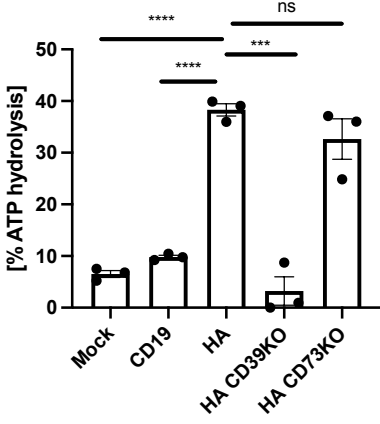

**E**

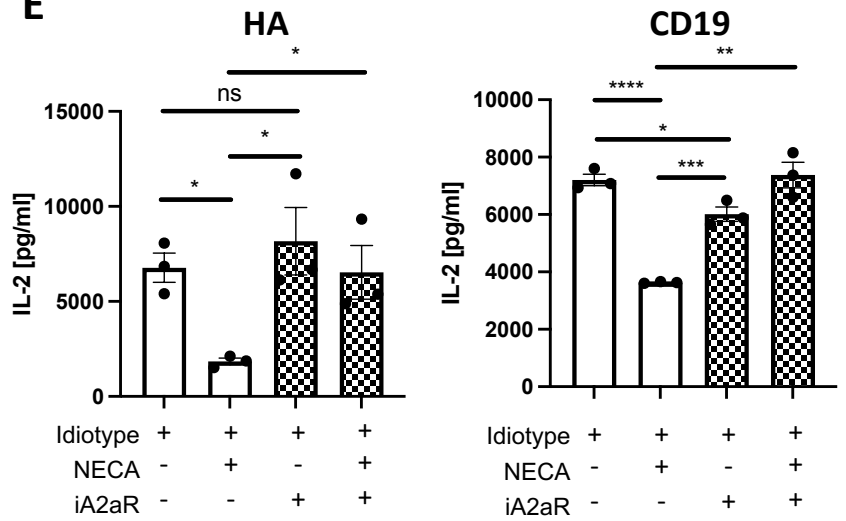

**F**

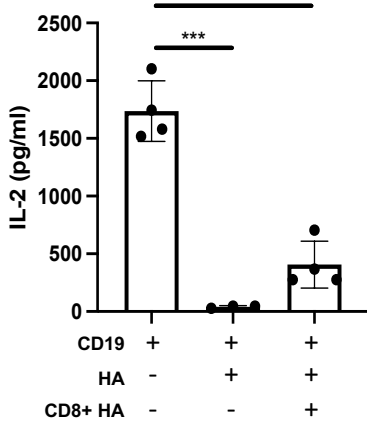

# Supplementary 2

## A

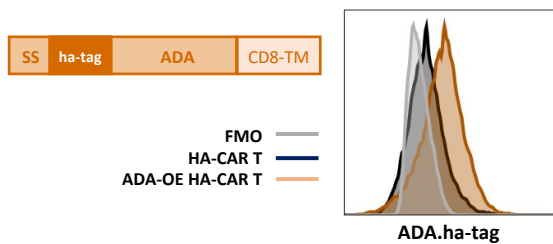

## B

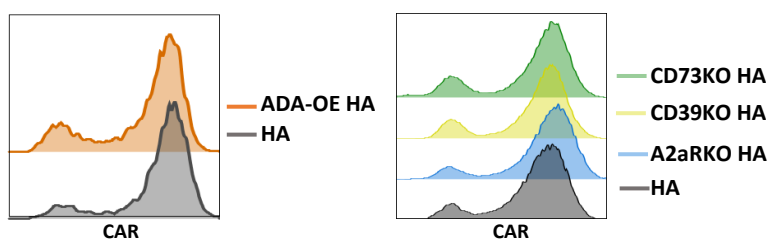

## C

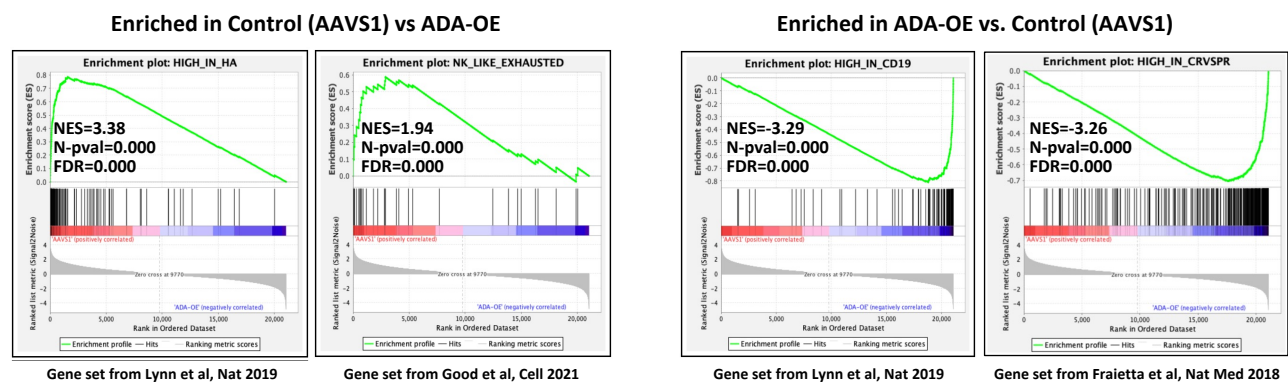

## D

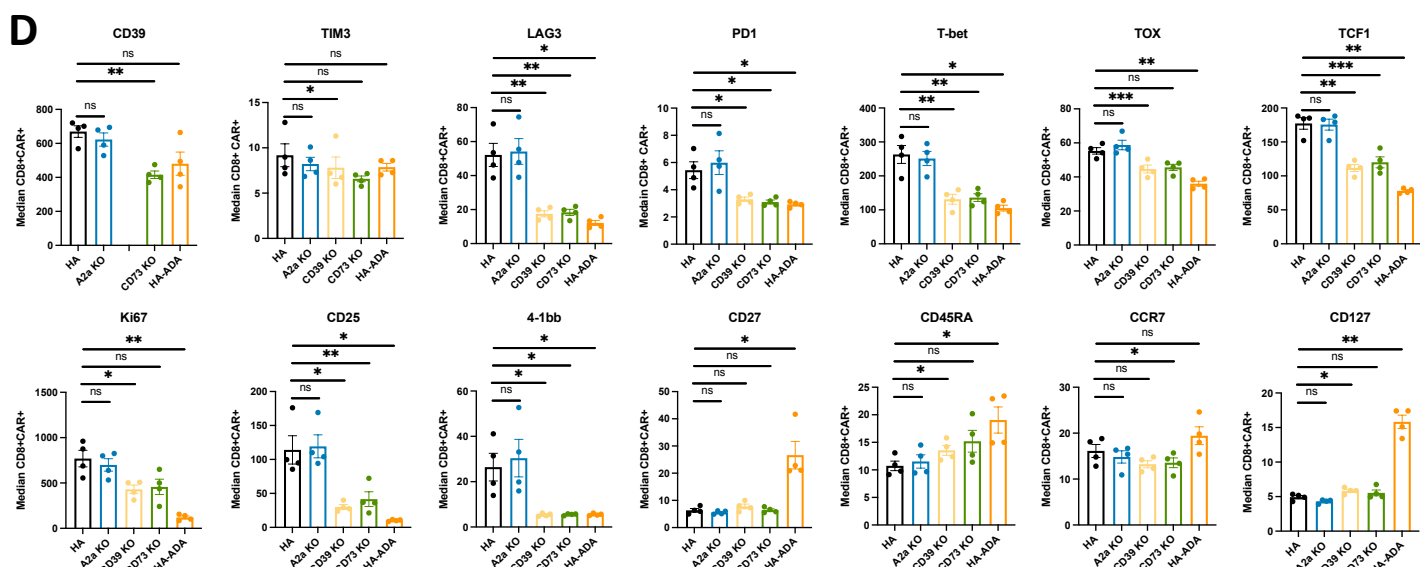

## E

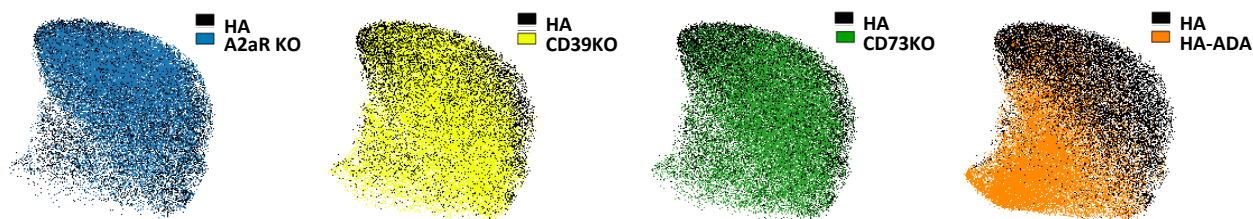

## F

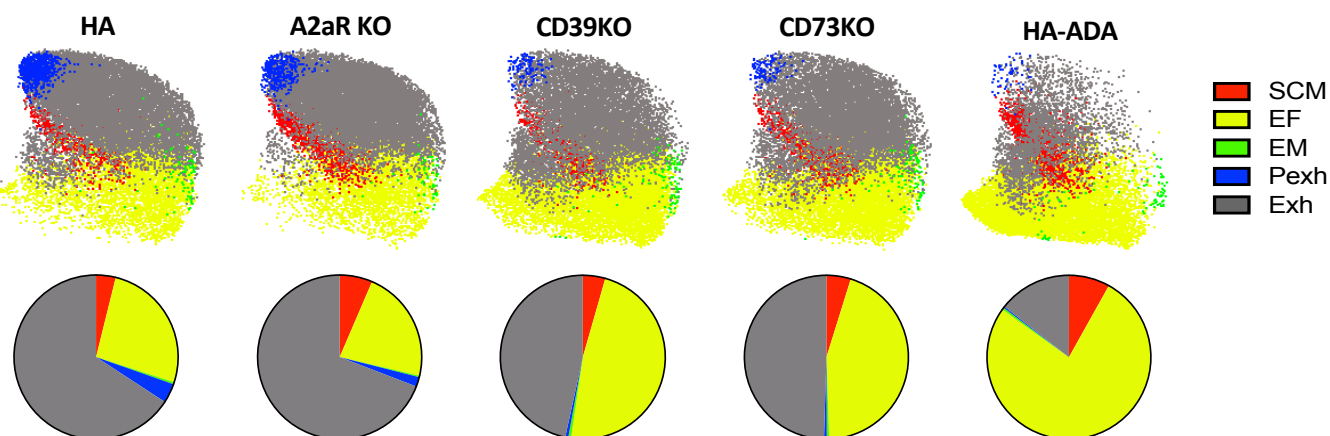

| CD4+ | HA                     |                        |         | A2aR KO                |                        |         | CD39 KO                |                        |         | CD73 KO                |                        |         | ADA-OE                 |                        |         |
|------|------------------------|------------------------|---------|------------------------|------------------------|---------|------------------------|------------------------|---------|------------------------|------------------------|---------|------------------------|------------------------|---------|
|      | Frequency (%) ± s.e.m. | Frequency (%) ± s.e.m. | P-value | Frequency (%) ± s.e.m. | Frequency (%) ± s.e.m. | P-value | Frequency (%) ± s.e.m. | Frequency (%) ± s.e.m. | P-value | Frequency (%) ± s.e.m. | Frequency (%) ± s.e.m. | P-value | Frequency (%) ± s.e.m. | Frequency (%) ± s.e.m. | P-value |
| SCM  | 3.87±2.574             | 6.47±2.682             | ns      | 4.41±1.902             | 4.81±2.441             | ns      | 8.11±1.728             | 0.0250                 |         |                        |                        |         |                        |                        |         |
| EF   | 26.1±6.45              | 22.2±10.392            | ns      | 47.88±13.96<br>1       | 44.65±12.96<br>1       | ns      | 76.78±6.782            | 0.0032                 |         |                        |                        |         |                        |                        |         |
| EM   | 0.41±0.145             | 0.28±0.118             | ns      | 0.55±0.154             | 0.47±0.121             | ns      | 0.42±0.084             | ns                     |         |                        |                        |         |                        |                        |         |
| Pexh | 3.83±2.147             | 1.9±0.73               | ns      | 0.59±0.465             | 0.53±0.144             | ns      | 0.27±0.053             | 0.0471                 |         |                        |                        |         |                        |                        |         |
| Exh  | 65.8±4.323             | 69.18±8.533            | ns      | 46.58±13.18<br>2       | 49.53±12.61<br>3       | ns      | 14.41±5.255            | 0.0013                 |         |                        |                        |         |                        |                        |         |

**A**

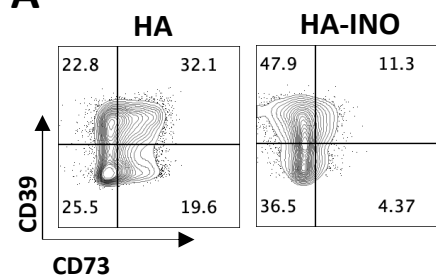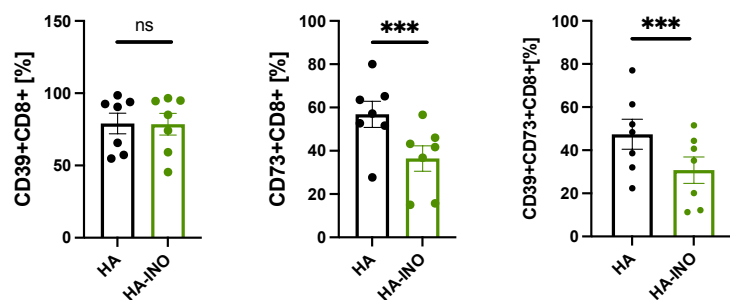

**B**

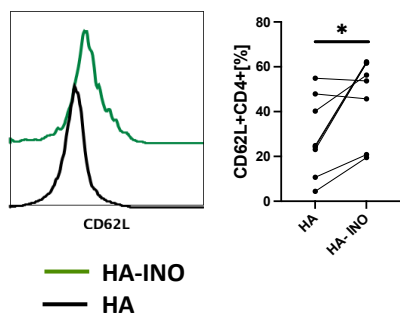

**C**

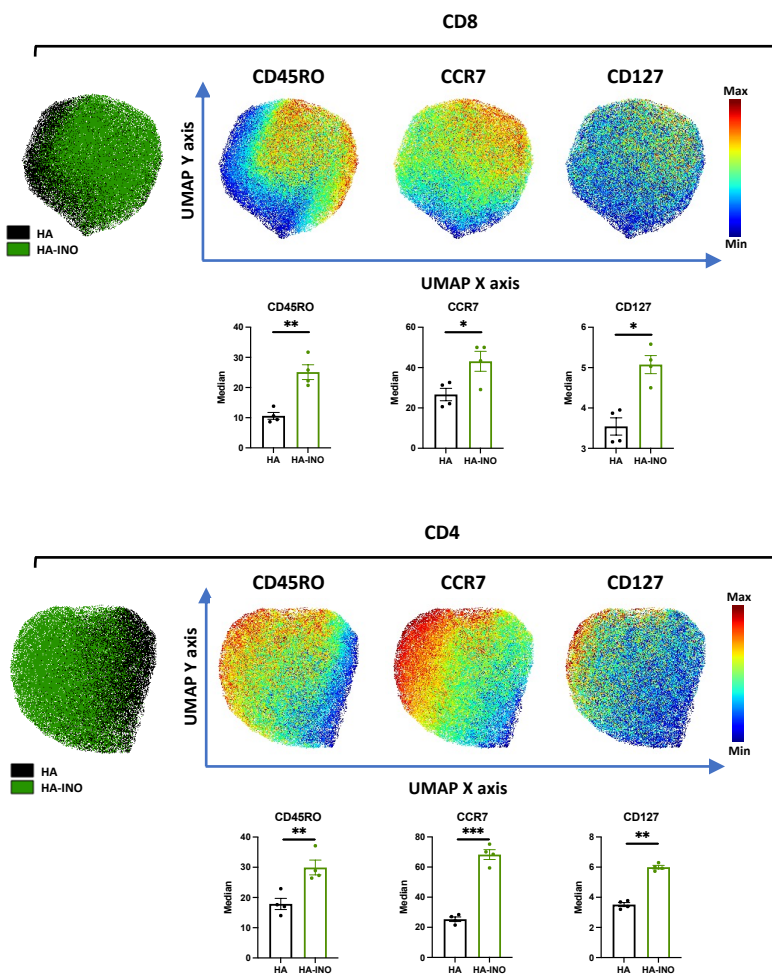

**D**

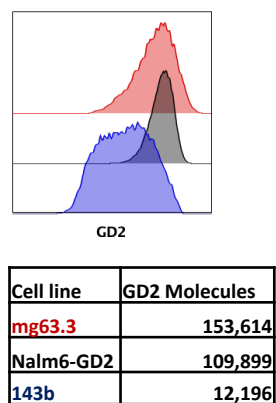

**E**

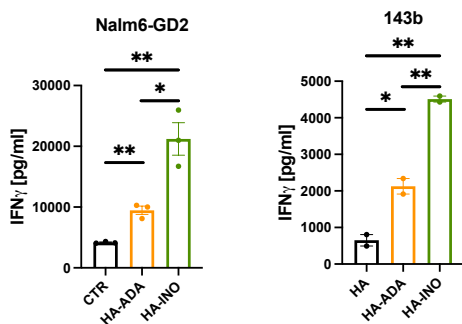

**G**

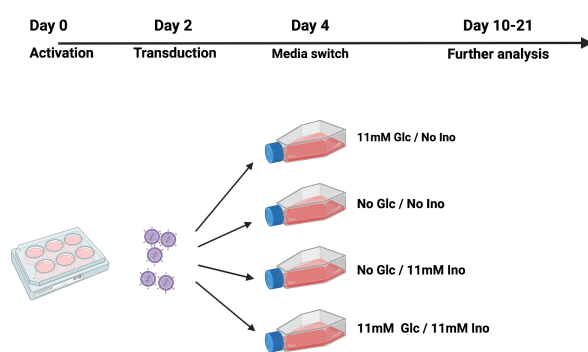

**F**

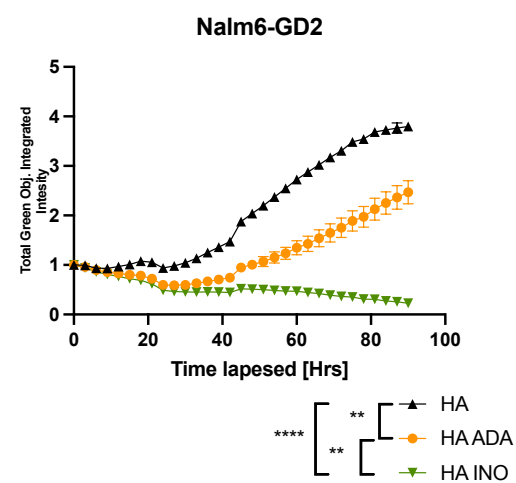

**H**

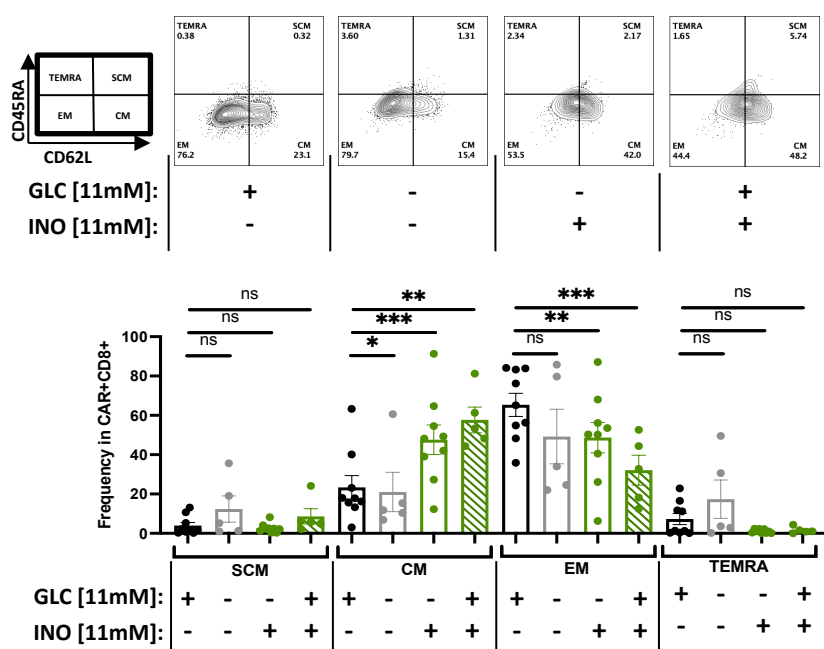

**A**

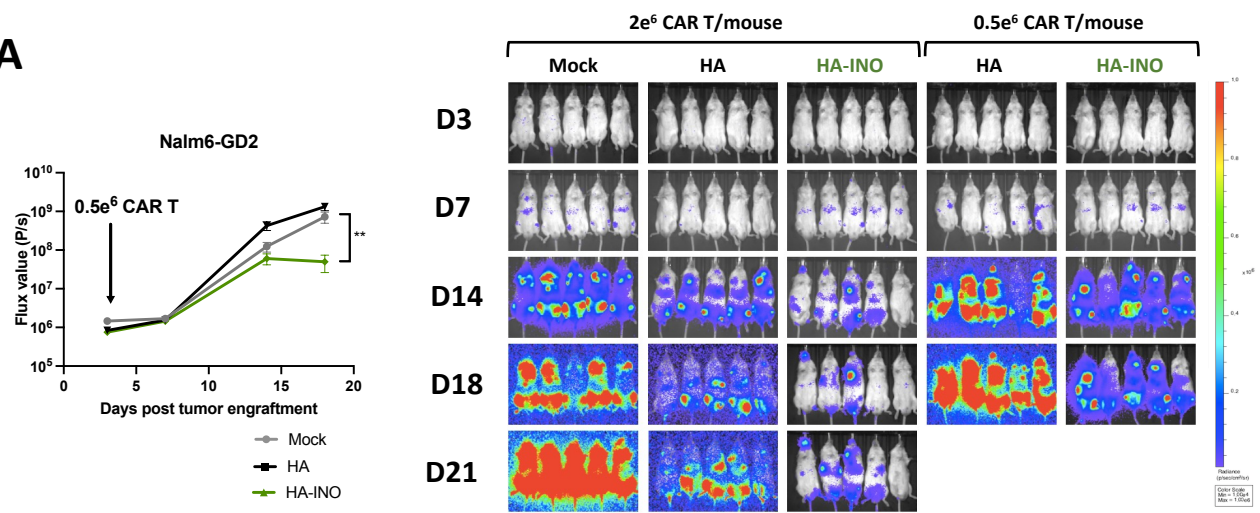

**B**

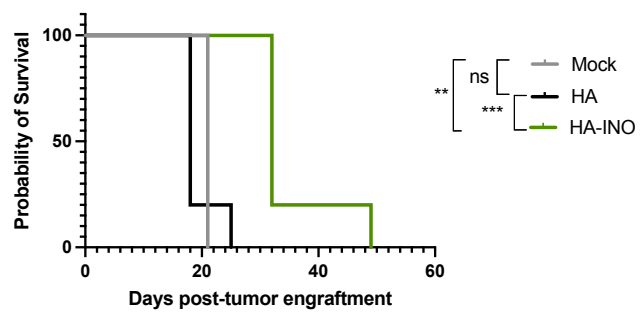

**C**

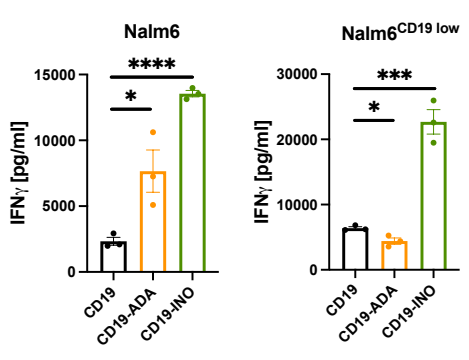

**D**

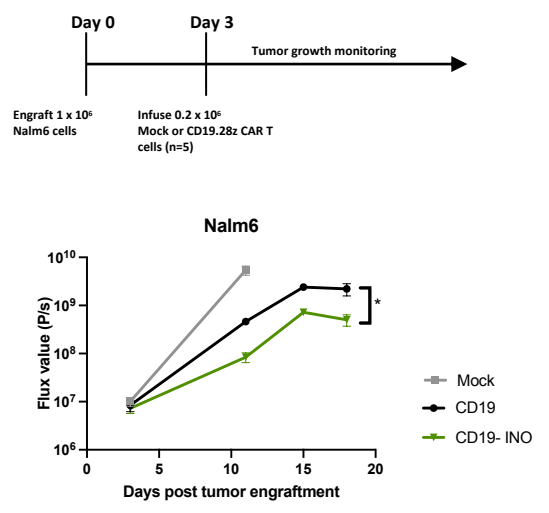

**E**

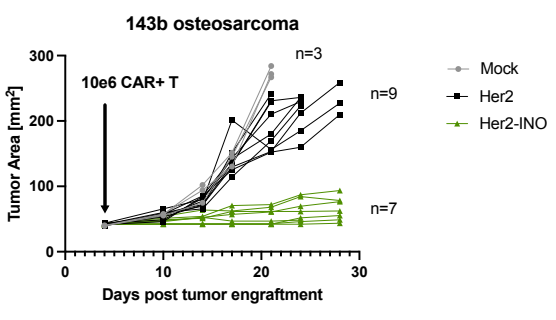

# Supplementary 5

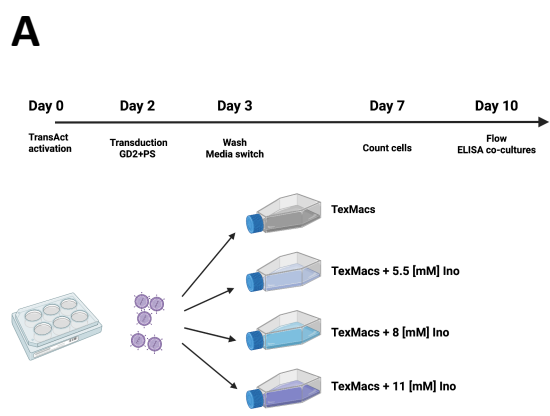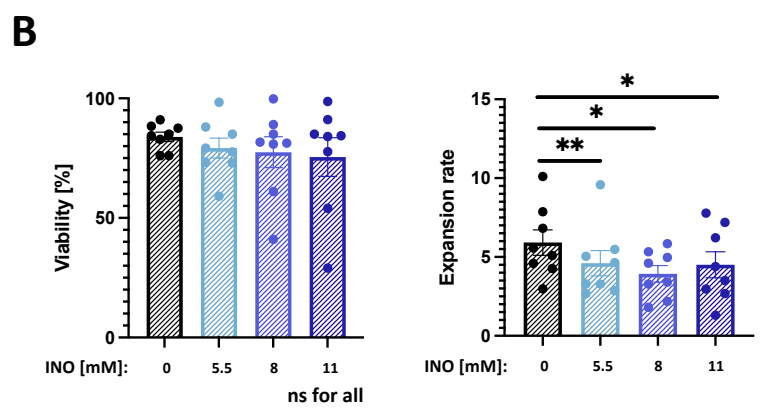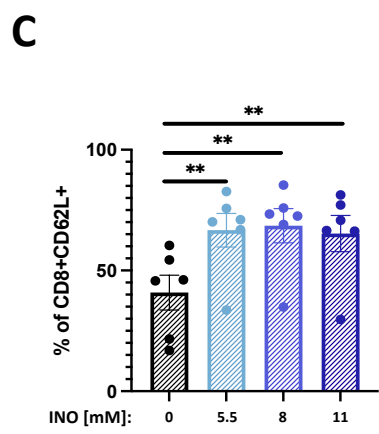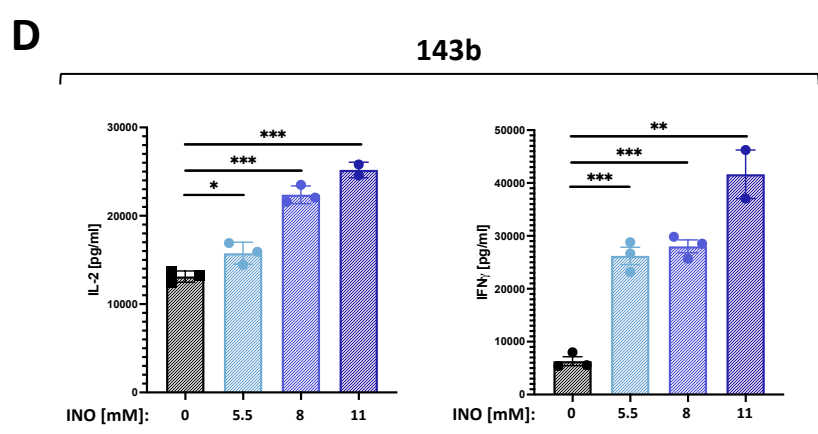

Supplement: media-1.pdf [file media-1.pdf]
